# Supplementary figures and images for: Use of High Protein and High Dietary Fibre Vegetable Processing Waste for Pasta Fortification
Source: Preprints.org preprint supplement (doi:10.20944/preprints202305.2251.v1), 2023-05-31

Table S1. Pictures of pasta samples

| **CON** | **DPS10** | **DPS20** | **DPS30** |
| --- | --- | --- | --- |
| **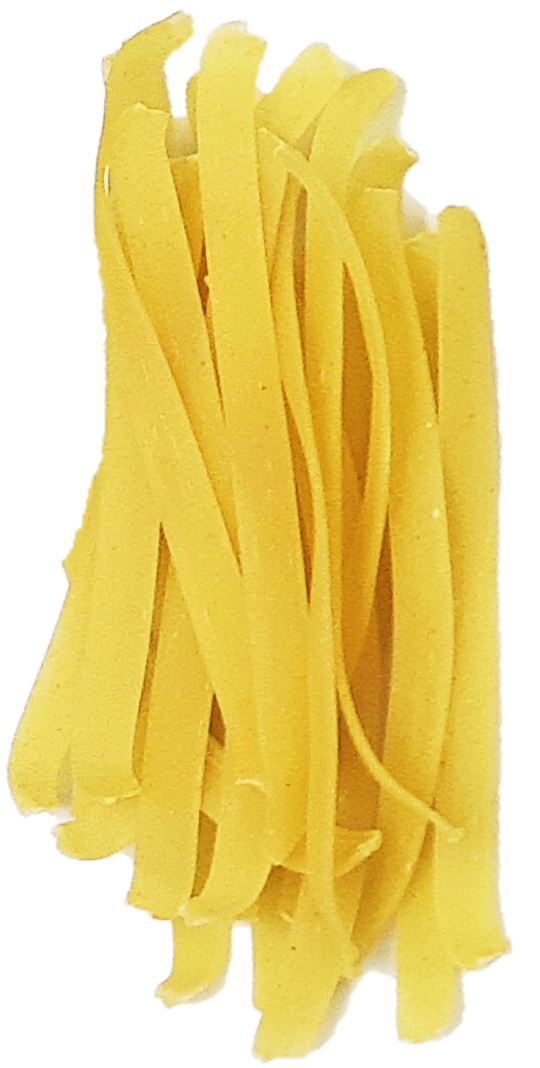** | **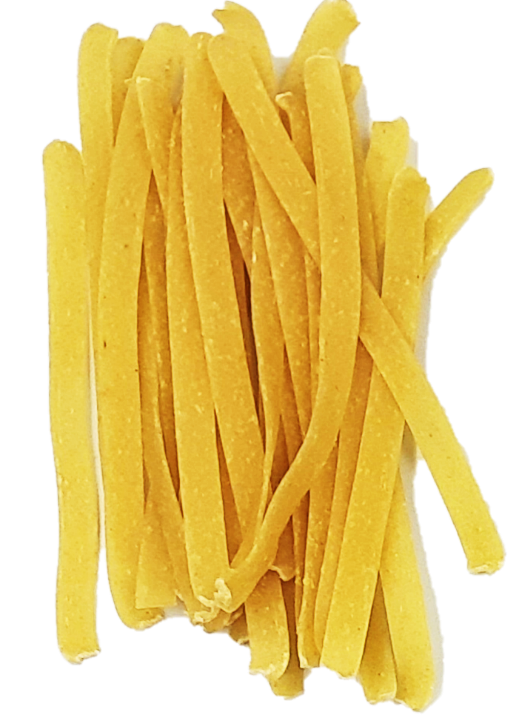** | **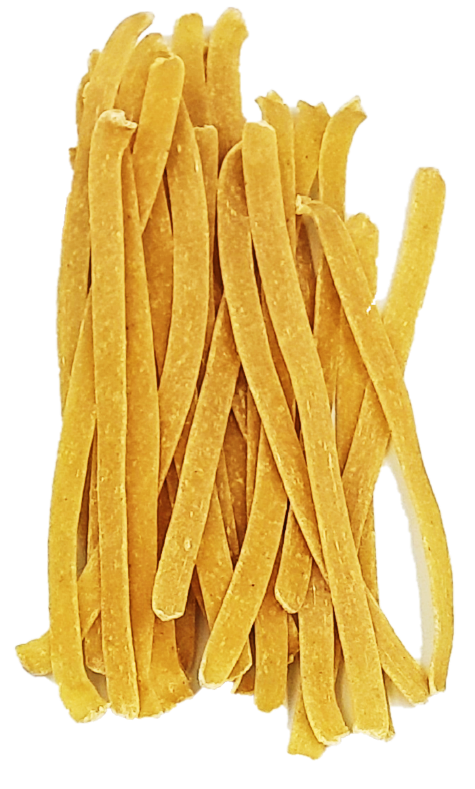** | **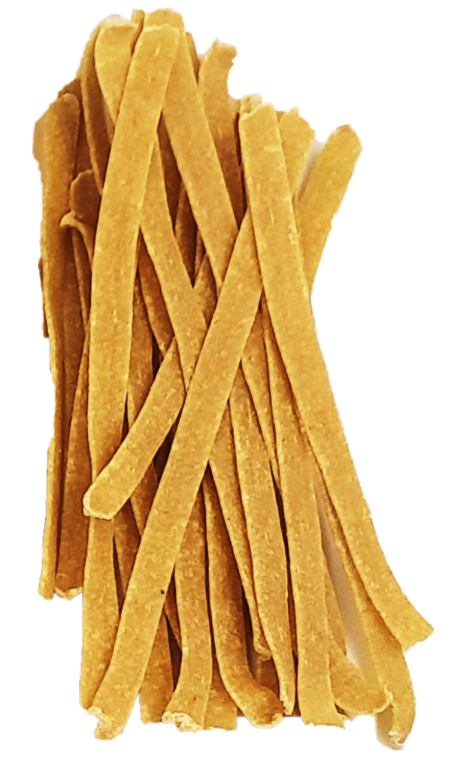** |
| **PP10** | **PP20** | **PP30** |
| **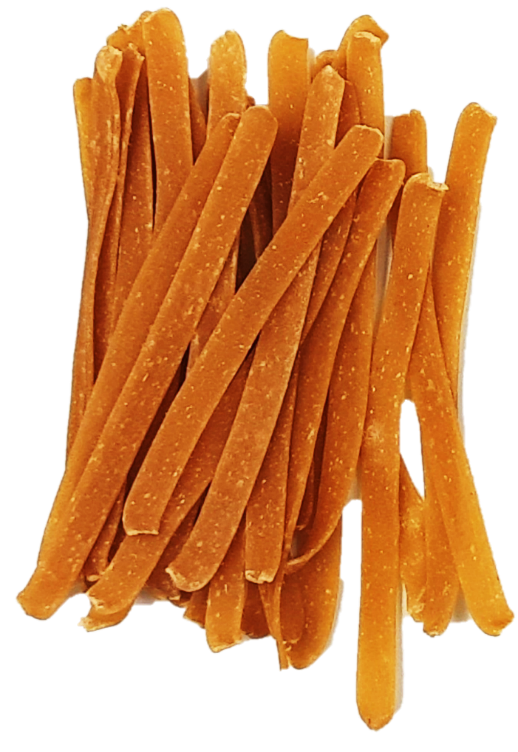** | **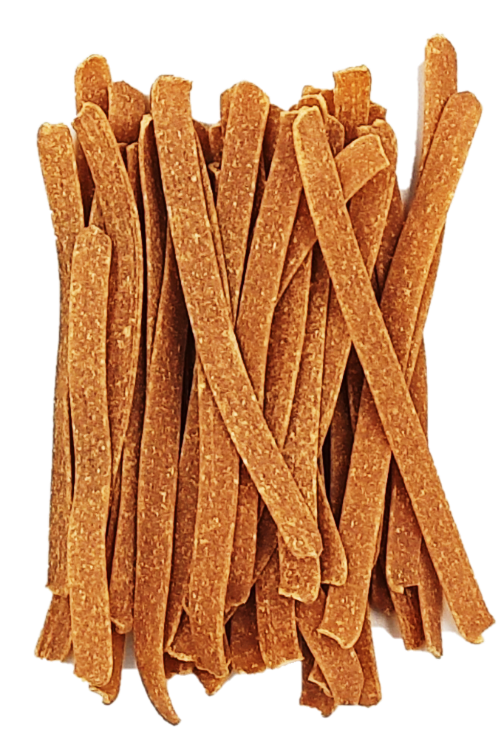** | **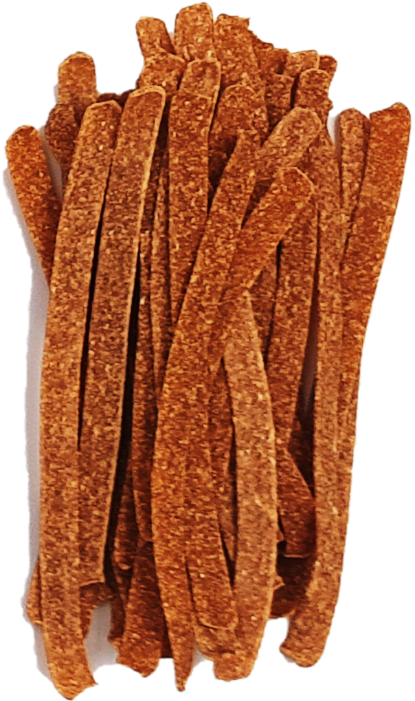** |
| **TW10** | **TW20** | **TW30** |
| **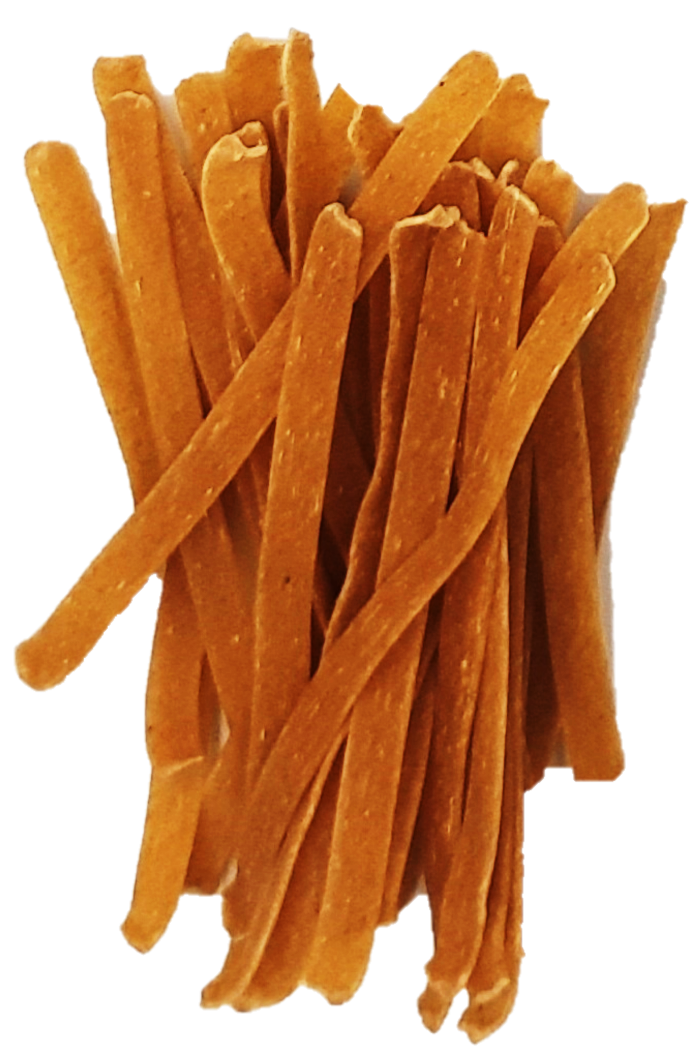** | **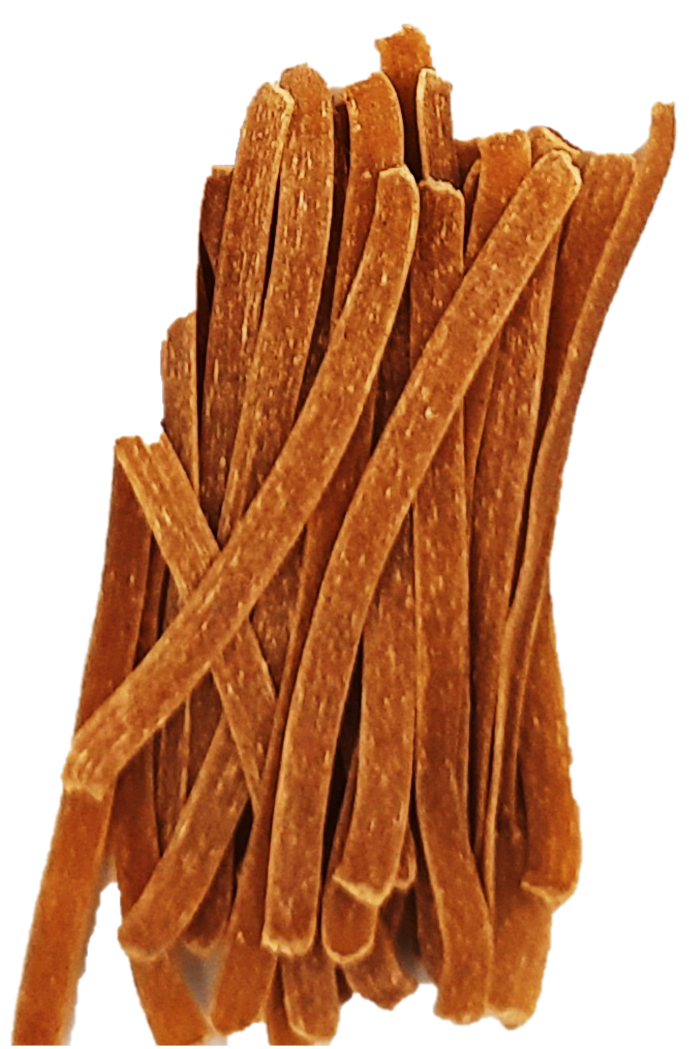** | **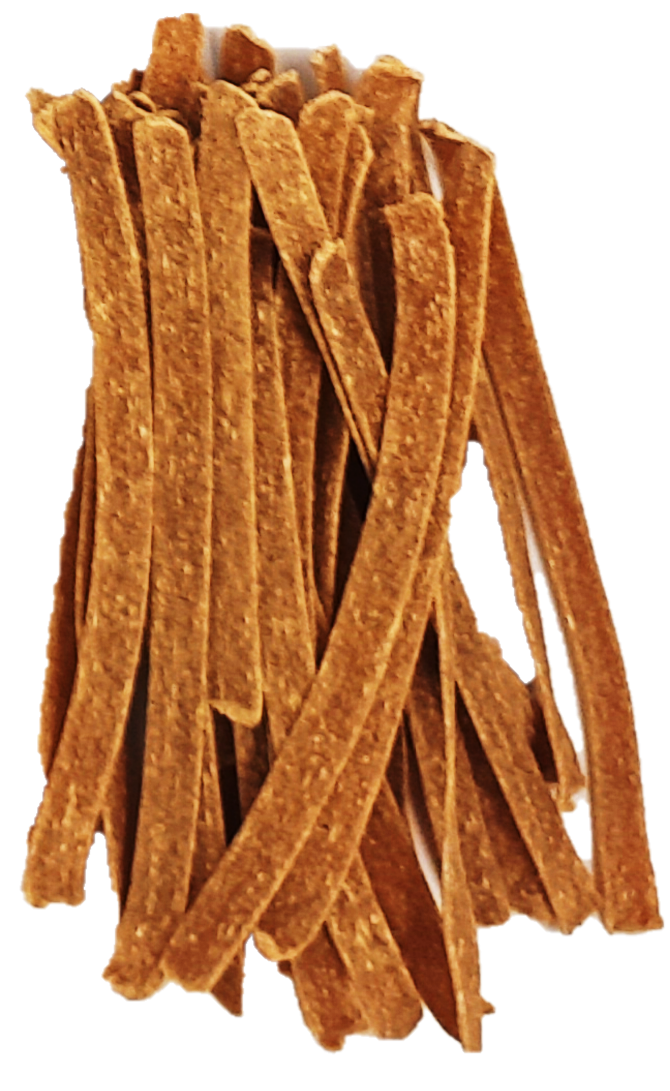** |

Supplement: Supplementary file 2 [file supplementary]
